# Supplementary material for: Antitumor imidazo[5,1-d]-1,2,3,5-tetrazines: compounds modified at the 3-position overcome resistance in human glioblastoma cell lines
Source: Royal Society of Chemistry journal article supplement (doi:10.1039/c6md00384b), 2016-01-01

Supplementary data.

Supplementary Figure 1.

Effect of **10m** on growth of glioblastoma cell lines.

A

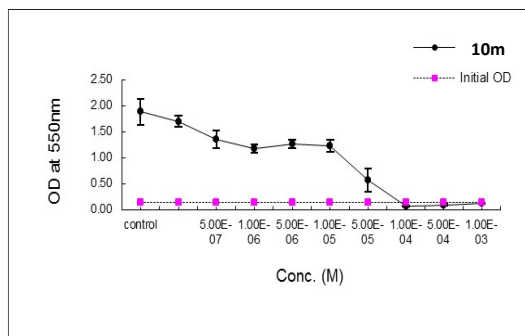

B

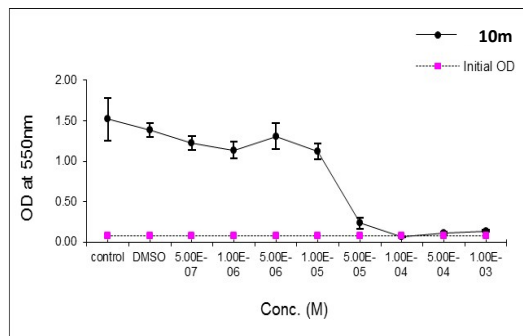

C

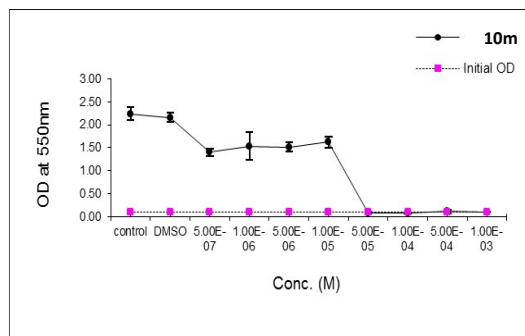

D

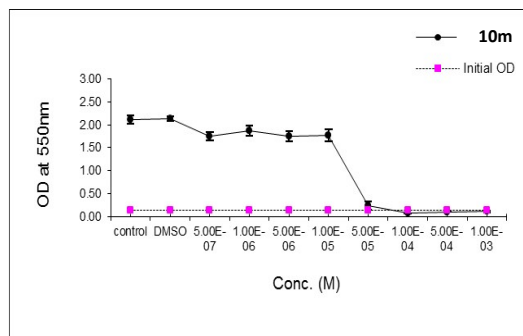

U373 (A, B) and SNB19 (C, D) cells were exposed to **10m** concentrations for 7 days. Cells had been transfected with MGMT (B, D; U373M, SNB19M respectively) or empty vector alone (A, C; U373V, SNB19V respectively). Cell growth (and inhibition) was monitored by performing MTT assays (a surrogate for viable cell numbers) at the time of test agent addition and following 7 days exposure. Estimated  $GI_{50}$  values (test agent able to inhibit cell growth by 50%) were calculated. Representative data points (means  $\pm$  SDs) from one experiment are shown ( $n = 4$ );  $\geq 4$  independent trials were carried out.

## Supplementary Figure 2.

Effect of **13g** on growth of glioblastoma cell lines.

A

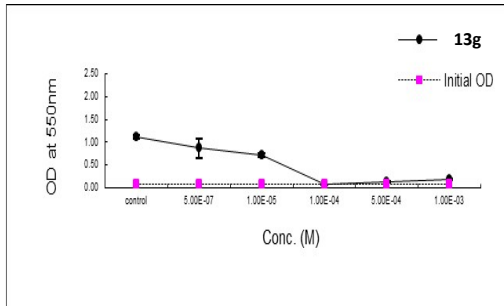

B

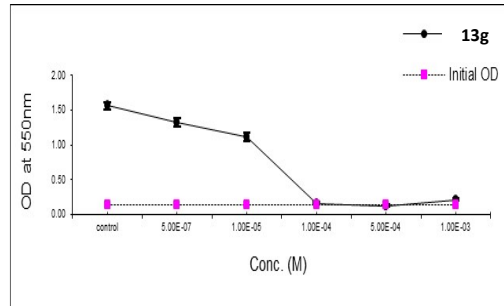

C

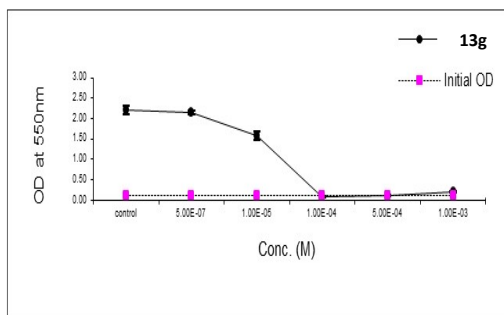

D

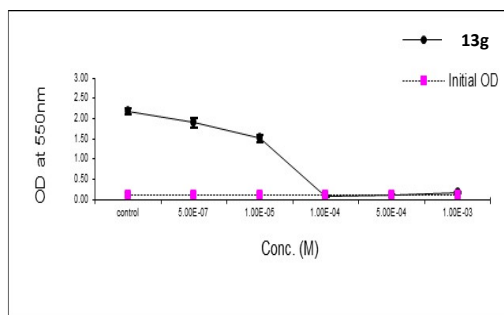

U373 (A, B) and SNB19 (C, D) cells were exposed to **13g** concentrations for 7 days. Cells had been transfected with MGMT (B, D; U373M, SNB19M respectively) or empty vector alone (A, C; U373V, SNB19V respectively). Cell growth (and inhibition) was monitored by performing MTT assays (a surrogate for viable cell numbers) at the time of test agent addition and following 7 days exposure. Estimated  $GI_{50}$  values (test agent able to inhibit cell growth by 50%) were calculated. Representative data points (means  $\pm$  SDs) from one experiment are shown ( $n = 4$ );  $\geq 4$  independent trials were carried out.

Supplementary Figure 3.

Bar graphs to depict mean  $\pm$  SDs GI<sub>50</sub> values of TMZ (**1**), **10m** and respective ring opened triazenes MTIC and **13g** against GBM cell lines. GI<sub>50</sub> values were calculated from  $\geq$  4 independent trials; n = 4 per concentration per trial.

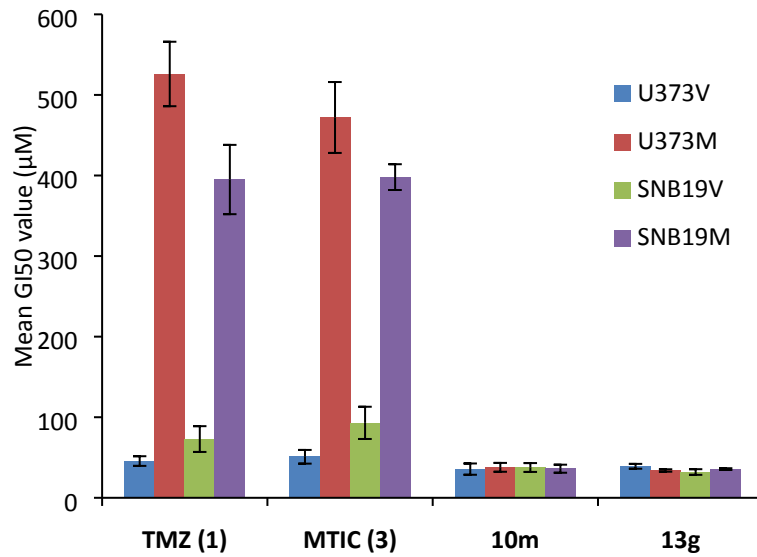

Supplement: c6md00384b1.pdf [file c6md00384b1.pdf]
